# Supplementary material for: The miR-625-3p/AXL axis induces non-T790M acquired resistance to EGFR-TKI via activation of the TGF-β/Smad pathway and EMT in EGFR-mutant non-small cell lung cancer
Source: PubMed Central journal article supplement — Oncol Rep. 2020 Apr 8;44(1):185–95. doi: 10.3892/or.2020.7579 (PMC7251657; doi:10.3892/or.2020.7579), 2020-04-08
Supplement: Supplementary_Data.pdf [file Supplementary_Data.pdf]

Figure S1. (A) miR-625-3p and (B) *AXL* mRNA expression in parental PC9 and gefitinib-resistant PC9GR cell lines. *AXL*, *AXL* receptor tyrosine kinase.

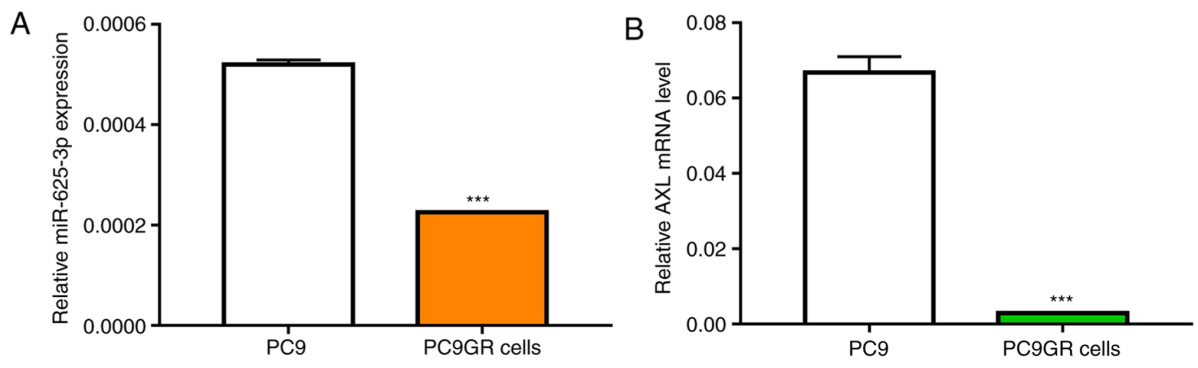

Figure S2. Luciferase activity in HCC827 and gefitinib-resistant HCC827GR cells after co-transfection of the construct containing the wild-type or mutant *AXL* 3'-UTR reporter gene and the miR-625-3p mimics or miR-NC. *AXL*, AXL receptor tyrosine kinase; UTR, untranslated region; NC, negative control.

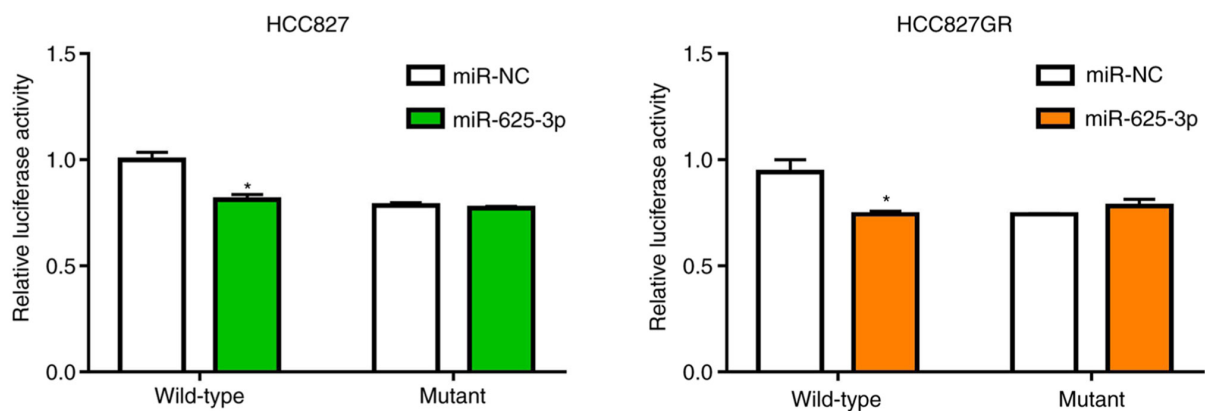

Table SI. List of 357 cancer detection genes.

|                     |                      |                     |                     |                     |                      |                      |
|---------------------|----------------------|---------------------|---------------------|---------------------|----------------------|----------------------|
| ABCB1               | CDK12                | ERCC3 <sup>GR</sup> | IGF2                | MYC <sup>GR</sup>   | PRKACA               | SMARCB1              |
| ABCC2               | CDK4                 | ERCC4               | IKBKE               | MYCL                | PRKAR1A              | SMO                  |
| ADH1B               | CDK6                 | ERCC5               | IKZF1               | MYCN <sup>GR</sup>  | PRKCI                | SOX2                 |
| AIP                 | CDK8                 | ESR1                | IKZF3               | MYD88               | PRSS1                | SPOP                 |
| AKT1                | CDKN1A               | ETV1                | IL7R                | NAT1                | PTCH1                | SPRY4                |
| AKT2                | CDKN1B               | ETV4                | INPP4B              | NBN                 | PTEN                 | SRC                  |
| AKT3                | CDKN1C               | EWSR1               | INPP5D              | NF1                 | PTK2                 | SRY                  |
| ALDH2               | CDKN2A               | EXT1                | IRF2                | NF2                 | PTPN11               | STAG2                |
| ALK                 | CDKN2B               | EXT2                | JAK1                | NFKBIA              | PTPRD                | STAT3                |
| AMER1               | CDKN2C               | EZH2                | JAK2                | NKX2-1              | QKI                  | STK11 <sup>GR</sup>  |
| APC <sup>GR</sup>   | CEBPA                | FANCA <sup>GR</sup> | JAK3                | NOTCH1              | RAC1                 | STMN1                |
| AR                  | CEP57                | FANCC <sup>GR</sup> | JUN                 | NOTCH2              | RAD50 <sup>GR</sup>  | STT3A                |
| ARAF                | CHD4                 | FANCD2              | KDM5A               | NPM1                | RAD51                | SUFU                 |
| ARID1A              | CHEK1 <sup>GR</sup>  | FANCE               | KDM6A               | NQO1                | RAD51C <sup>GR</sup> | TEK                  |
| ARID2               | CHEK2 <sup>GR</sup>  | FANCF               | KDR                 | NRAS                | RAD51D <sup>GR</sup> | TEKT4                |
| ARID5B              | CREBBP               | FANCG               | KIF5B               | NSD1                | RAF1                 | TERC                 |
| ASXL1               | CRKL                 | FANCL               | KIT                 | NTRK1               | RARA                 | TERT                 |
| ATM <sup>GR</sup>   | CSF1R                | FAT1                | KITLG               | PAK3                | RB1 <sup>GR</sup>    | TET2                 |
| ATR <sup>GR</sup>   | CTCF                 | FBXW7               | KLLN                | PALB2 <sup>GR</sup> | RECQL4               | TGFBR2 <sup>GR</sup> |
| ATRX                | CTLA4                | FGF19               | KMT2A               | PALLD               | RET                  | THADA                |
| AURKA               | CTNNB1               | FGFR1               | KMT2B               | PARK2               | RHOA                 | TMEM127              |
| AURKB               | CXCR4                | FGFR2               | KRAS                | PARP1               | RICTOR               | TMPRSS2              |
| AXIN2               | CYLD                 | FGFR3               | LHCGR               | PARP2               | RNF146               | TNFAIP3              |
| AXL                 | CYP19A1              | FGFR4               | LMO1                | PAX5                | RNF43                | TNFRSF11A            |
| BAK1                | CYP2A6               | FH                  | LYN                 | PBRM1               | ROSI                 | TNFRSF14             |
| BAP1                | CYP2B6               | FLCN                | LZTR1               | PCDH11Y             | RPTOR                | TNFRSF19             |
| BARD1               | CYP2C19              | FLT1                | MAP2K1              | PDCD1               | RRM1                 | TNFSF11              |
| BCL2                | CYP2C9               | FLT3                | MAP2K2              | PDCD1LG2            | RTEL1                | TOP1                 |
| BCL2L11             | CYP2D6               | FLT4                | MAP2K4              | PDE11A              | RUNX1                | TOP2A                |
| BIRC3               | CYP3A4               | GATA1               | MAP3K1              | PDGFRA              | SBDS                 | TP53                 |
| BLM <sup>GR</sup>   | CYP3A5               | GATA2               | MAP4K3              | PDGFRB              | SDC4                 | TPMT                 |
| BMPR1A              | DAXX                 | GATA3               | MAX                 | PDK1                | SDHA                 | TSC1                 |
| BRAF                | DDR2                 | GATA4               | MCL1                | PGR                 | SDHAF2               | TSC2                 |
| BRCA1               | DENND1A              | GATA6               | MDM2                | PHOX2B              | SDHB <sup>GR</sup>   | TSHR                 |
| BRCA2               | DHFR                 | GNA11               | MDM4                | PIK3C3              | SDHC                 | TTF1                 |
| BRD4                | DICER1 <sup>GR</sup> | GNAQ                | MED12               | PIK3CA              | SDHD <sup>GR</sup>   | TUBB3                |
| BRIP1 <sup>GR</sup> | DNMT3A               | GNAS                | MEF2B               | PIK3R1              | SERP2                | TYMS                 |
| BTG2                | DPYD                 | GRIN2A              | MEN1                | PIK3R2              | SETBP1               | UGT1A1               |
| BTK                 | DUSP2                | GRM3                | MET                 | PKD1                | SETD2                | VEGFA                |
| BUB1B               | EGFR                 | GSTM1               | MGMT                | PKD2                | SF3B1                | VHL <sup>GR</sup>    |
| c11orf30            | EML4                 | GSTP1               | MITF                | PKHD1               | SGK1                 | WAS                  |
| CBL                 | EP300                | GSTT1               | MLH1 <sup>GR</sup>  | PLK1                | SH2D1A               | WISP3                |
| CBLB                | EPAS1                | HDAC2               | MLH3 <sup>GR</sup>  | PMS1 <sup>GR</sup>  | SHOX                 | WRN                  |
| CCND1               | EPCAM                | HGF                 | MPL                 | PMS2 <sup>GR</sup>  | SLC34A2              | WT1                  |
| CCNE1               | EPHA2                | HNF1A               | MRE11A              | POLD1               | SLC7A8               | XPA                  |
| CD274               | EPHA3                | HNF1B               | MSH2 <sup>GR</sup>  | POLE                | SLX4                 | XPC                  |
| CD74                | ERBB2                | HRAS                | MSH3 <sup>GR</sup>  | POLH                | SMAD2                | XRCC1                |
| CDA                 | ERBB3                | HSD3B1              | MSH6 <sup>GR</sup>  | POT1                | SMAD3                | YAP1                 |
| CDC73               | ERBB4                | IDH1                | MTHFR               | PPP2R1A             | SMAD4 <sup>GR</sup>  | ZNF2                 |
| CDH1 <sup>GR</sup>  | ERCC1                | IDH2                | MTOR                | PRDM1               | SMAD7                | ZNF217               |
| CDK10               | ERCC2                | IGF1R               | MUTYH <sup>GR</sup> | PRF1                | SMARCA4              | ZNF703               |

Key genes of chemotherapy are highlighted in red. Key genes of targeted treatment are shown in blue. <sup>GR</sup>Genetic risk genes are indicated in green. The remaining genes in purple font are important driver genes.

Table SII. Hiseq-4000 second generation gene high-throughput sequencing.

| Cell line | EGFR<br>CNV | EGFR<br>(19-del) | EGFR<br>(20-T790M) |
|-----------|-------------|------------------|--------------------|
| PC9       | 5.79        | Yes              | No                 |
| PC9GR     | 3.40        | Yes              | Yes                |
| HCC827    | 21.70       | Yes              | No                 |
| HCC827GR  | 8.10        | Yes              | No                 |

HCC827GR, gefitinib-resistant HCC827 cells; PC9GR, gefitinib-resistant PC9 cells; EGFR, epidermal growth factor receptor; CNV, copy number variation.
